# Supplementary material for: Laser Direct Writing and Raman Stokes-Contrast Screening of Quantum Emitter Sites in hBN
Source: Research Square preprint supplement (doi:10.21203/rs.3.rs-8436272/v1), 2026-02-04
Supplement: Supplementary file 1 [file 2735d7cd0078c6732fdb5636.docx]

**Supplementary Material**

Laser Direct Writing and Raman Stokes-Contrast Screening of Quantum Emitter Sites in hBN

T. Paulauskas,* J. Janušonis, E. Markauskas, V. Nargelienė, V. Šilys, I. Bibi, D. Rutkauskas, S. Keršulis, V. Bukauskas, M. Talaikis

Center for Physical Sciences and Technology, Sauletekio al 3, Vilnius LT-10257, Lithuania

*Corresponding author: [tadas.paulauskas@ftmc.lt](mailto:tadas.paulauskas@ftmc.lt)

**Contents**

1. **Second-order correlation measurements**
2. **Raman data**
3. **Polarization-resolved photoluminescence**
4. **Second-order correlation measurements**

Second-order correlation function, , measurements were performed using a standard two-channel configuration where the incoming light is split with a 50:50 beamsplitter and detected using two single photon counting modules SPCM-AQRH-14 from Excelitas, connected to a Picoharp 300 (PicoQuant) time correlation module.

Experimental data shows photon antibunching at short timescales and bunching at intermediate timescales (Fig. S2). A typical minimal model to account for this behavior is a three-level model (Fig. S1) which leads to the following form of a two-photon correlation function [1, 2]:

. (S1)


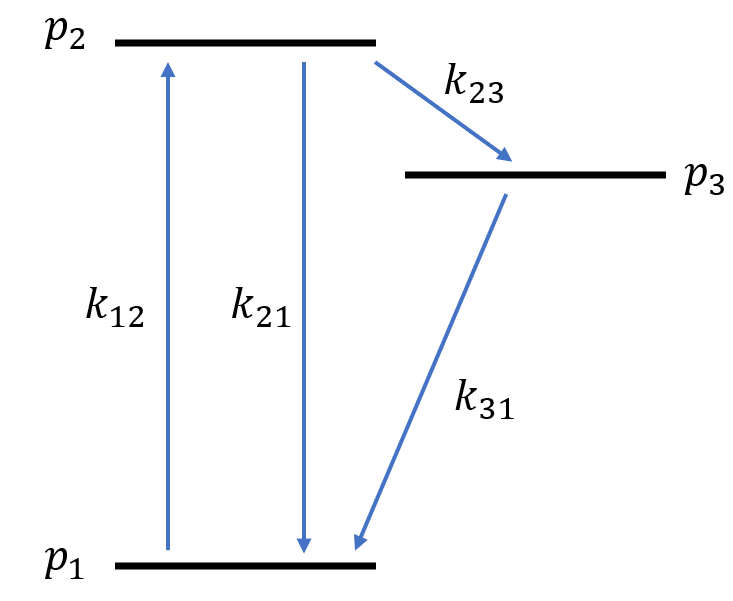


Fig. S1. Definition of the three-level model parameters: 1 - ground state, 2 - excited state, 3- shelving state, denotes the population of the *i*-th state, and is the transition rate from *i*-th to the *j*-th state.

This function is further convolved with a Gaussian approximation of an instrument response function (IRF). In our configuration the IRF is dominated by the detector timing jitter of ~350 ps, which leads to the timing jitter between two detector channels of ~500 ps. After convolution, model data are further binned into 0.5 ns bins to match the experimental data.

We fit experimental data with this model and obtain , , and values listed in Table S1.

Next, we use model parameters , , and to obtain the transition rates . In the limit where fluorescent relaxation channel dominates, and shelving/deshelving rates and are much lower , the relations are [1,2]:

(S2)

After measuring fluorescent relaxation rate k21 = 0.291 ns-1, we calculate the lifetimes of the shelving state relaxation pathway and and also list them in Table S1.


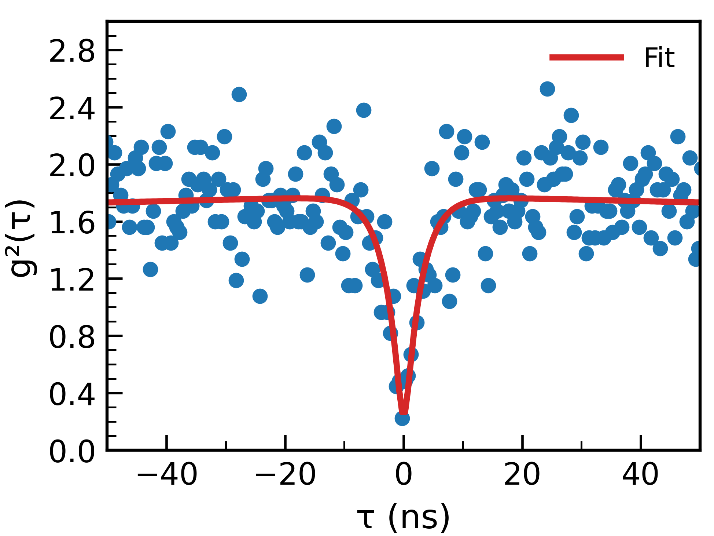

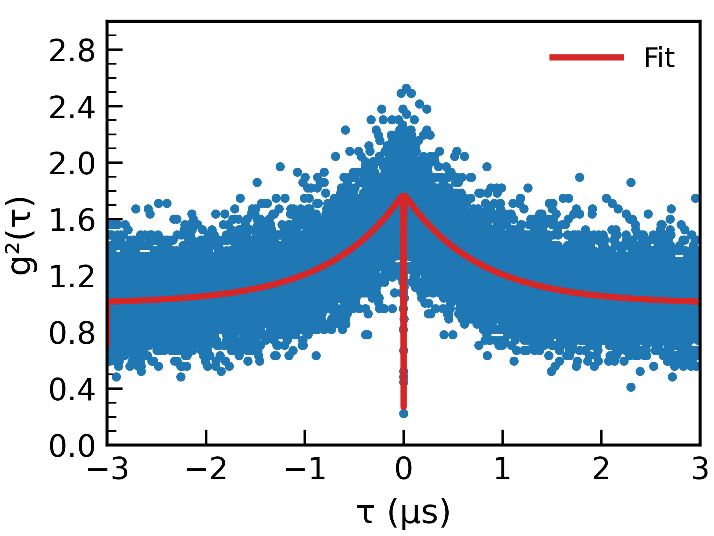


(b)

(a)


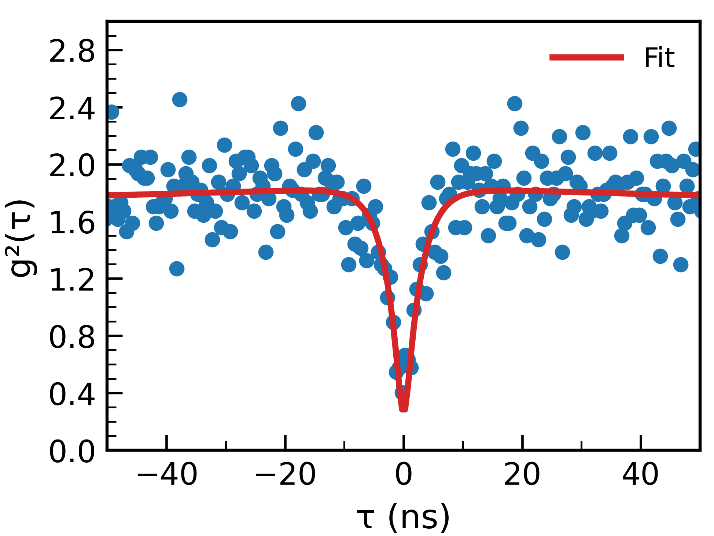

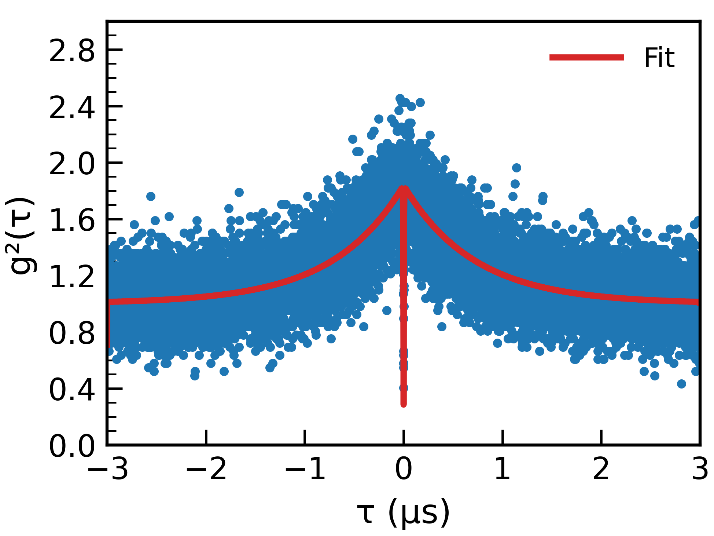


(d)

(c)


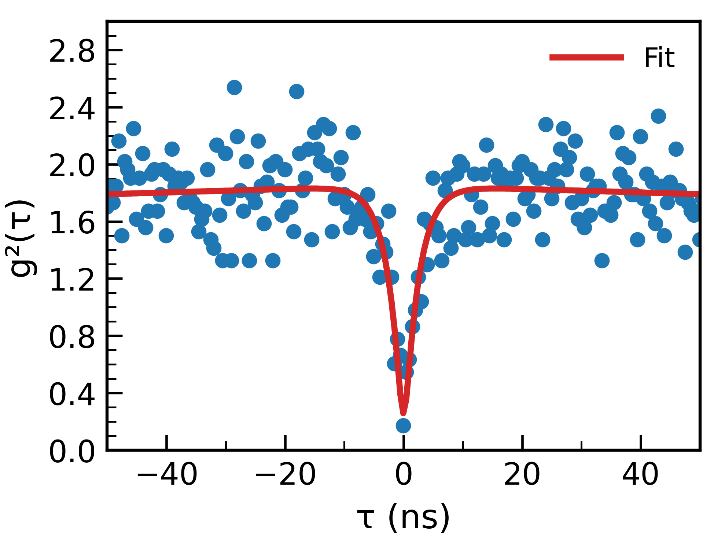

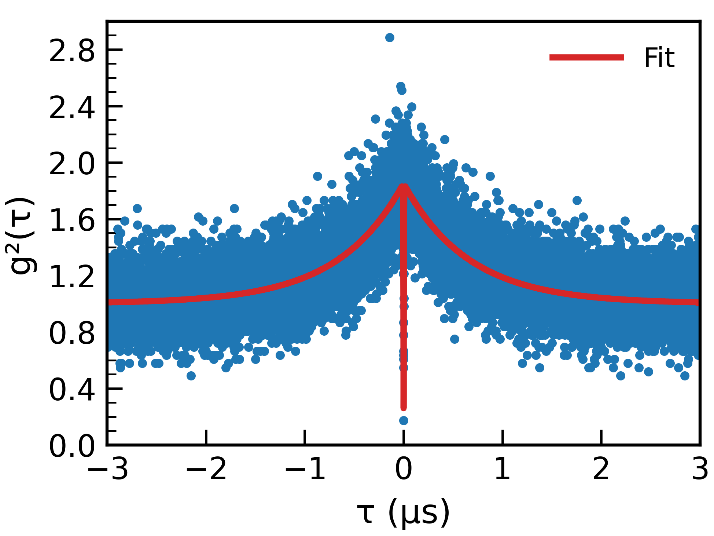


(f)

(e)

Fig. S2. g(2) experimental data and three-level fit of single photon emitters. (a) and (b) correspond to #1 in Table S1. (a) shows antibunching dynamics at shorter time scales and (b) shows bunching at intermediate timescales. Similar data for emitter #2 are shown in (c) and (d), and emitter #3: (e) and (f) respectively.

Table S1. Results of the g(2) function fit. To calculate of and we take the fluorescent transition rate .

| Emitter # | a | , ns-1 | , μs-1 | , ns | , ns | g(2)(0) |
| --- | --- | --- | --- | --- | --- | --- |
| 1 | 0.783 ± 0.008 | 0.364 ± 0.027 | 1.33 ± 0.02 | 340 ± 130 | 1340 ± 15 | 0.24 |
| 2 | 0.834 ± 0.007 | 0.379 ± 0.024 | 1.41 ± 0.02 | 360 ± 100 | 1310 ± 12 | 0.26 |
| 3 | 0.853 ± 0.007 | 0.417± 0.028 | 1.52 ± 0.02 | 430 ± 90 | 1220 ± 12 | 0.28 |

**References**

1. Kitson, S. C., Jonsson, P., Rarity, J. G., & Tapster, P. R. (1998). Intensity fluctuation spectroscopy of small numbers of dye molecules in a microcavity. *Physical Review A*, *58*(1), 620.

2. Fishman, R. E. K. Photon-Emission-Correlation Spectroscopy as an Analytical Tool for Solid-State Quantum Defects. *PRX Quantum* 2023, *4* (1). <https://doi.org/10.1103/PRXQuantum.4.010202>.

1. **Raman data**

Raman measurements were performed to investigate strain and potential changes in the hBN crystal structure after laser irradiation. Measured hBN samples were located on a silica substrate, and the target area was scanned in 0.5 µm steps using 532 nm continuous-wave (CW) excitation, as described in the Experimental Methods section of the main text. The result, averaged over the entire scanned area of one of the samples, is shown in Fig. S3.


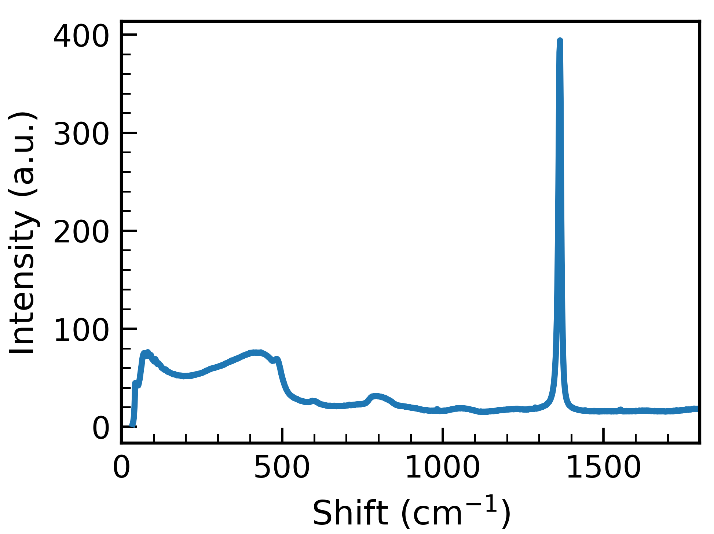

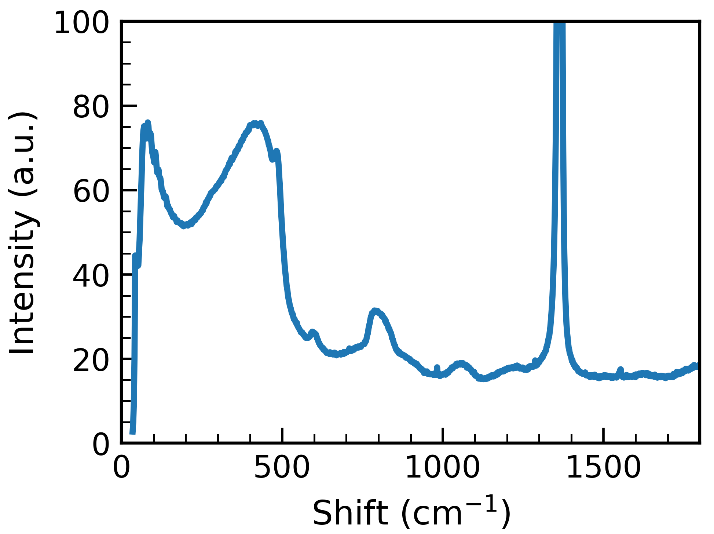


(b)

(a)

Fig S3. Raman spectrum, averaged over the full sample area. (a) full range, (b) zoomed in.

To separate Raman lines from the baseline, we used SNIP (Sensitive Nonlinear Iterative Peak-Clipping) [1] algorithm provided by the pybaselines [2] package. To achievehigh-quality background removal in the scan and account for slow background changes, we averaged the spectra in the sliding 3x3 window around the target spectrum.

An example of initial and background-removed data is shown in Fig. S4. In the averaged spectrum the most prominent line is hBN-related E2g at 1367 cm-1, associated with in-plane B–N bond stretching, similar to G-band in graphite and graphene. In addition to E2g, another Raman-active line in hBN is A1g, an out-of-plane vibration, however it is typically a weak low frequency line that was not observed in our experiment. The rest of the Raman structure in Fig. S4 matches reported spectra of silica [3], featuring an asymmetric main band (R) at 430 cm-1 linked to oxygen motions within SiO4 tetrahedra, sharp D1 and D2 peaks at 495 cm-1 and 606 cm-1 associated with breathing motions of oxygen in 3 and 4-member rings, asymmetric band A at 800 cm-1, and high-frequency doublet at 1060 and 1200 cm-1, associated with the stretching of Si-O–Si bonds and stretching involving SiO4 tetrahedral units [3].


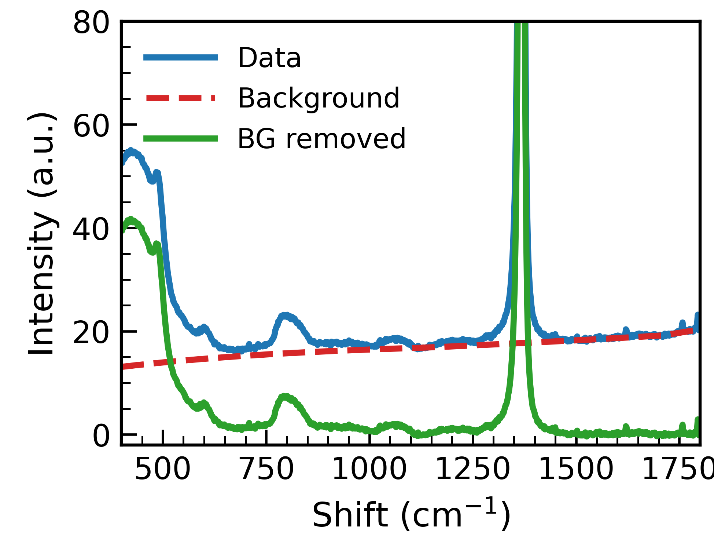


Fig. S4. Illustration of the background removal procedure. The dataset is the same as in Fig. S3.

A few studies have shown traces of a cubic BN phase either after a laser treatment of hBN [4] or after ion implantation [5,6]. Photoluminescence from laser-irradiated sites in cubic BN (cBN) has also been reported [7]. Thus, it is of interest to examine whether cBN phase is present at our laser-irradiated sites on hBN.


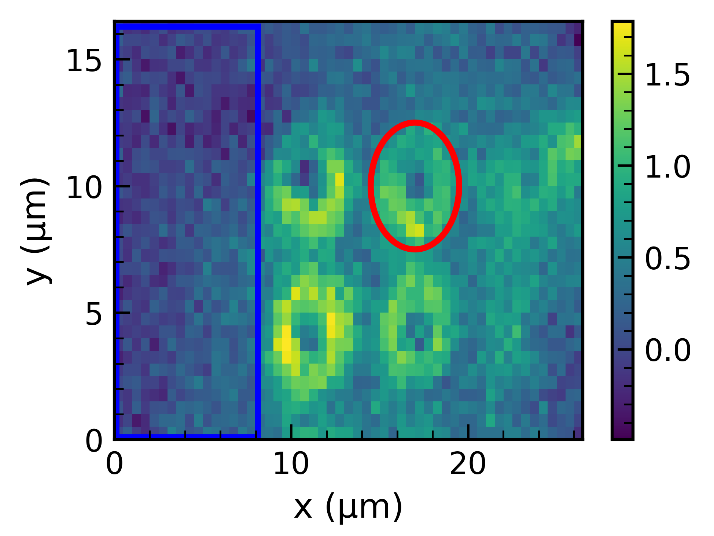

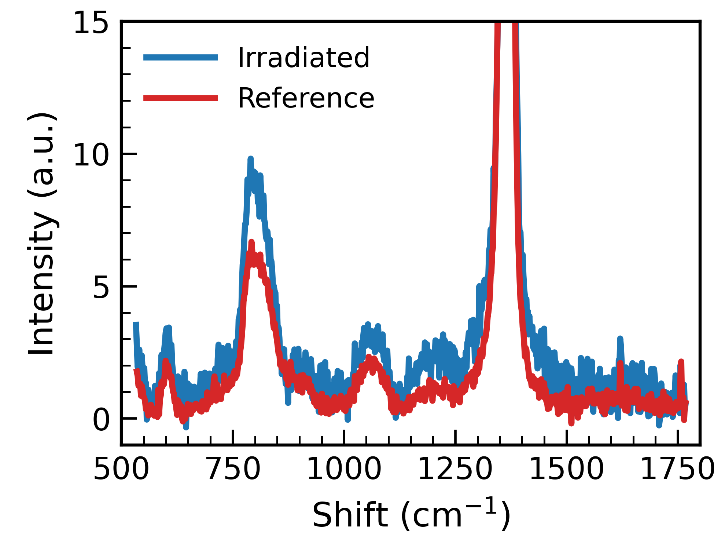


Fig S5. Averaged Raman spectra of the irradiated site (highlighted in red) and reference (highlighted in blue). Irradiated site spectra are chosen within a radius of 3 μm from the center of the irradiated site.

Raman line frequencies associated with cubic BN (cBN) have been reported at 1056 cm-1 and 1306 cm-1 [8-10]. Theoretical calculations [11] indicate that cBN has a triply degenerate T₂ optical phonon mode at the Γ point, which splits into lower-frequency transverse (TO) modes at 1055 cm⁻¹ and a longitudinal (LO) mode at approximately 1303 cm⁻¹. The higher LO frequency arises from the polar nature of hBN, as LO–TO splitting is typical of polar semiconductors.

We integrated the Raman spectra over the laser-affected areas and compared the results with a non-affected reference. An example of the data from one of the affected sites is shown in Fig. S5. Apart from the change in amplitude, which we attribute to reduced thickness and interference effects in the hBN flake, no evident spectral lines appear near the typical cBN frequencies.

After the background estimate we evaluated the parameters of the main Raman line E2g by fitting it with a single Lorentzian function and extracting its peak position, amplitude, and width. A typical fit result is shown in Fig. S6, indicating that a Lorentzian fit properly represents experimental data.


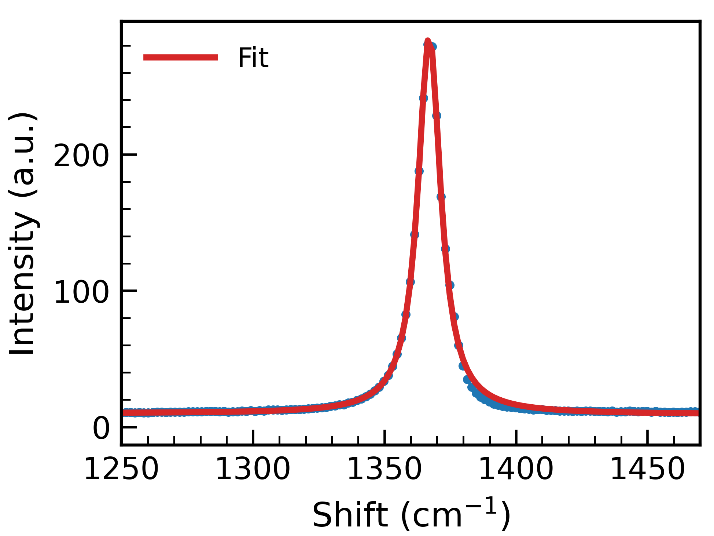


Fig. S6. E2g Raman peak fit with a Lorentzian function.

**References**

1. Morháč, M.; Matoušek, V. Peak Clipping Algorithms for Background Estimation in Spectroscopic Data. *Appl Spectrosc* 2008, *62* (1), 91–106. <https://doi.org/10.1366/000370208783412762>.
2. Erb, D. Pybaselines: A Python Library of Algorithms for the Baseline Correction of Experimental Data, 2025. <https://doi.org/10.5281/zenodo.16790579>.
3. Gerbig, Y. B.; Michaels, C. A. In-Situ Raman Spectroscopic Measurements of the Deformation Region in Indented Glasses. *Journal of Non-Crystalline Solids* 2020, *530*, 119828. <https://doi.org/10.1016/j.jnoncrysol.2019.119828>.
4. Hou, S.; Birowosuto, M. D.; Umar, S.; Anicet, M. A.; Tay, R. Y.; Coquet, P.; Tay, B. K.; Wang, H.; Teo, E. H. T. Localized Emission from Laser-Irradiated Defects in 2D Hexagonal Boron Nitride. *2D Mater.* 2017, *5* (1), 015010. <https://doi.org/10.1088/2053-1583/aa8e61>.
5. Aradi, E.; Naidoo, S. R.; Erasmus, R. M.; Julies, B.; Derry, T. E. Investigations on the Characterization of Ion Implanted Hexagonal Boron Nitride. *Nuclear Instruments and Methods in Physics Research Section B: Beam Interactions with Materials and Atoms* 2013, *307*, 214–217. <https://doi.org/10.1016/j.nimb.2012.12.118>.
6. Aradi, E.; Naidoo, S. R.; Erasmus, R. M.; Julies, B.; Derry, T. E. Raman Studies on the Effect of Multiple-Energy Ion Implantation on Single-Crystal Hexagonal Boron Nitride. *Radiation Effects and Defects in Solids* 2015, *170* (3), 175–182. <https://doi.org/10.1080/10420150.2014.984612>.
7. Buividas, R.; Aharonovich, I.; Seniutinas, G.; Wang, X. W.; Rapp, L.; Rode, A. V.; Taniguchi, T.; Juodkazis, S. Photoluminescence from Voids Created by Femtosecond-Laser Pulses inside Cubic-BN. *Opt. Lett., OL* 2015, *40* (24), 5711–5713. <https://doi.org/10.1364/OL.40.005711>.
8. Lukomskii, A. I.; Shipilo, V. B.; Shishonok, E. M.; Anichenko, N. G. Raman Scattering of Cubic Boron Nitride. 1987, *102* (2), 137–137.
9. Alvarenga, A. D.; Grimsditch, M.; Polian, A. Raman Scattering from Cubic Boron Nitride up to 1600 K. *J. Appl. Phys.* 1992, *72* (5), 1955–1956. <https://doi.org/10.1063/1.351671>.
10. Eremets, M. I. Optical Properties of Cubic Boron Nitride. *Phys. Rev. B* 1995, *52* (12), 8854–8863. <https://doi.org/10.1103/PhysRevB.52.8854>.
11. Ohba, N. First-Principles Study on Structural, Dielectric, and Dynamical Properties for Three BN Polytypes. *Phys. Rev. B* 2001, *63* (11). <https://doi.org/10.1103/PhysRevB.63.115207>.
12. **Polarization-resolved photoluminescence**

Fig. S7 shows additional polarization-resolved PL data of hBN SPEs. Data visualization and analysis follow main text Fig. 6. Two other red emitters are shown here with incomplete polarization suppression, as evident from the spectra at minima-maxima. Furthermore, the PSB-looking feature of SPE in Fig. S7(d-f) may in fact be additional weak emitter, rather than its actual PSB, as seen from highly offset polarization angle.

`


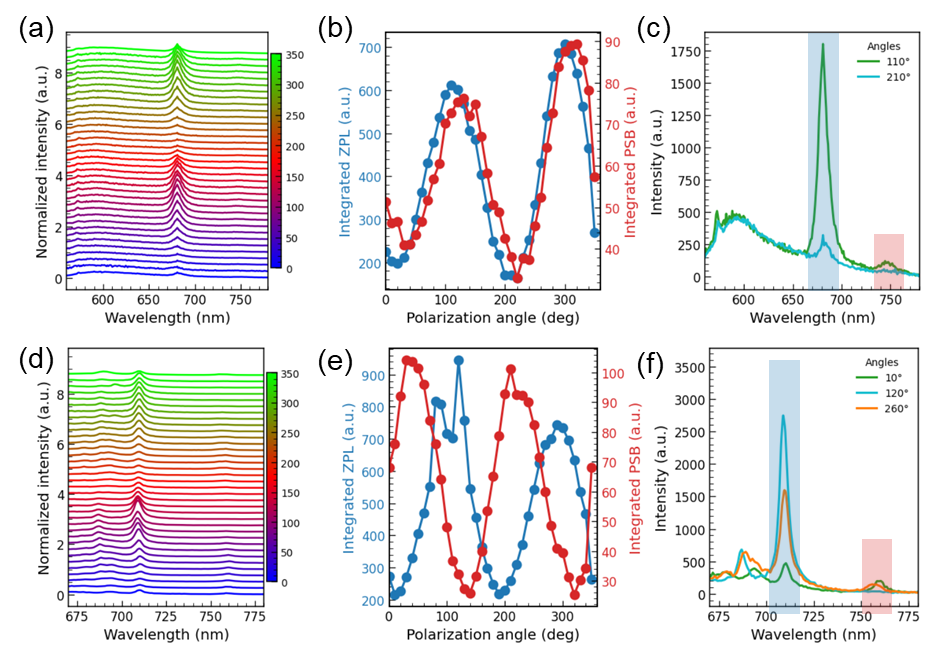


Fig. S7. Polarization-resolved PL data of two SPEs. Data visualization follows main text Fig. 6.
